# Supplementary material for: What does Community Want? - A Qualitative Study of how the pharmacy profession should walk with First Nations Australians
Source: Research Square preprint supplement (doi:10.21203/rs.3.rs-6092556/v1), 2025-03-13
Supplement: Supplementary file 1 [file a7b23f090bf18c24685bf20a.pdf]

## **INTERVIEW GUIDE FOR THE STUDY**

Co-designing case-studies to educate Australian  
Pharmacists to provide culturally safe healthcare and  
competently handle health inquiries of Aboriginal and/or  
Torres Strait Islander people

## Interview guide

Thank you for talking to me. This is my research project, something I am doing for my study. We would like to know how YOU feel about your health y having a yarn with you. With us talking today is just like you share things with your family and friends. I will not be repeating this to your doctor/pharmacist. If you do choose to help me, this information on how you feel about your health and all the things you have to do to manage/take care of your health will help me and your doctors/pharmacists understand how to make things better for you or your friends who may have other health issues. If you feel you don't want to talk to me it is all right. You don't have to. Not talking to me will not change anything.

We would like to audio-record the yarn today so that I can accurately remember issues raised and better reflect your desires for how pharmacists and health professionals can better serve you. This is because I may not be able to write as fast as you speak and I would like to make sure I know what you said exactly, so I make no mistakes. Again, I am not going to give the recording to anyone- only me and my supervisors/colleagues at university will hear this recording, as they are also interested in my work. Anyone hearing the recording will not know who you are, who your parents/family or friends are.

*Q1. How do you feel about having a health issue?*

### **Prompts**

- ☐ No problem
- ☐ Not able to perform daily activities
- ☐ Makes my family worried
- ☐ Worries me
- ☐ Have to take medication

*Q2. What did your doctor tell you about your health problem?*

**Prompts**

- ☐ Did not tell
- ☐ Talked about medicines/medicine
- ☐ Not a big problem
- ☐ It may go away

*Q3. How frequently do you take these medicines/medications?*

**Prompts**

- ☐ What are the symptoms you have when you use the medications?
- ☐ When do they happen?
  - In the morning
  - At night
  - Other times
- ☐ How often do they happen?
  - Every day
  - Few times a week
  - Few times a year

*Q4. How do you understand when the doctor/pharmacist talks to you or about your medications?*

**Prompts**

- ☐ Don't understand
- ☐ Understand some things but not others

*Q5. How would you like the doctor/pharmacist to explain more to YOU about the treatment for your health problem?*

**Prompts**

- ☐ Talk to you so you understand
- ☐ Use social media
- ☐ Use alternative ways

*Q6. Do you have any concerns or faced any discrimination when dealing with the doctor/pharmacist? Could you discuss?*

**Prompts**

- ☐ Never faced
- ☐ Faced few/many times

*Q7. How do you think pharmacists can be better trained to help you and your communities?*

*We would like to thank you for your time and commitment to research about the management/ training of pharmacists about Indigenous Health.*
